# Supplementary material
Source: HighWire-hosted journal article supplement (https://ejhp.bmj.com/highwire/filestream/151532/field_highwire_adjunct_files/0/ejhpharm-2021-003071supp001_data_supplement.pdf)
Supplement: ejhpharm-2021-003071supp001_data_supplement.pdf [file ejhpharm-2021-003071supp001_data_supplement.pdf]

**Supplementary file 1:** Total time and time used during each step of the medication reconciliation process for the first 50 patients of each group. Scattered boxes represent the interquartile range of the before group, dotted boxes after group.

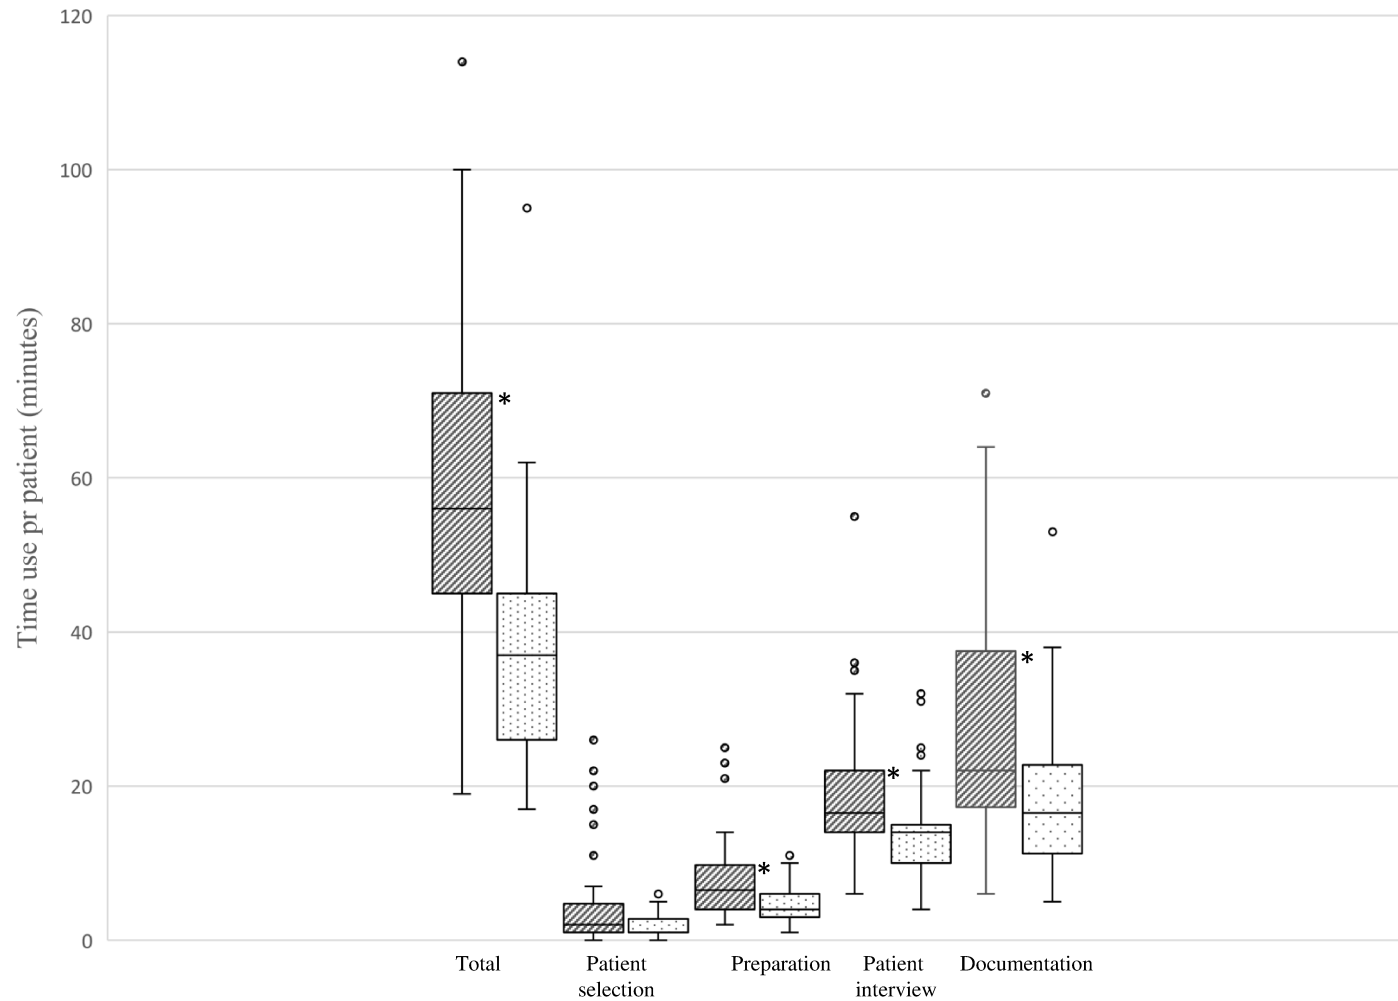

\* statistically significant difference between before and after group ( $P < 0.05$ )
